# Supplementary material for: Pure bromide-based inorganic perovskite sky-blue light-emitting diodes through phase control by the NiOx anode interface
Source: Royal Society of Chemistry journal article supplement (doi:10.1039/d2tc01395a), 2022-01-01
Supplement: d2tc01395a1.pdf [file d2tc01395a1.pdf]

## Supporting Information

### **Pure Bromide-Based Inorganic Perovskite Sky-Blue Light-Emitting Diodes through Phase Control by NiO<sub>x</sub> Anode Interface**

Kai Sun,<sup>ab</sup> Zhiqiang Bao,<sup>ab</sup> Xiaoyang Guo,<sup>\*a</sup> Jianfeng Ou,<sup>ab</sup> Ying Lv,<sup>a</sup> Deyue Zou,<sup>ab</sup> Li  
Song,<sup>\*c</sup> Yantao Li,<sup>a</sup> Xingyuan Liu<sup>a</sup>, Jingqiu Liang<sup>\*a</sup>

<sup>a</sup>State Key Laboratory of Luminescence and Applications, Changchun Institute of Optics, Fine Mechanics and Physics, Chinese Academy of Sciences, Changchun 130033, China

<sup>b</sup>University of Chinese Academy of Sciences, Beijing 100049, China

<sup>c</sup>Tianjin Key Laboratory of Electronic Materials and Devices, School of Electronics and Information Engineering, Hebei University of Technology, 5340 Xiping Road, Tianjin 300401, P. R. China

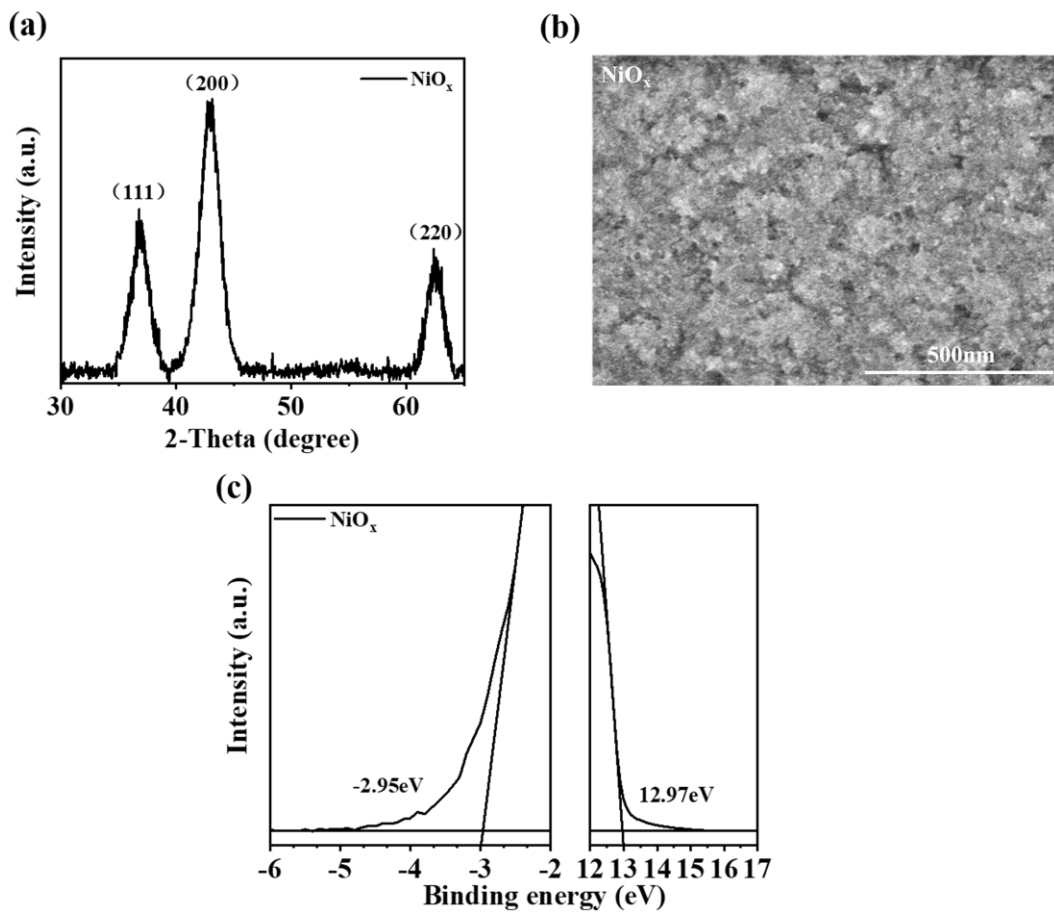

**Figure S1.** (a) XRD patterns, (b) SEM image, and (c) UPS of NiO<sub>x</sub> film.

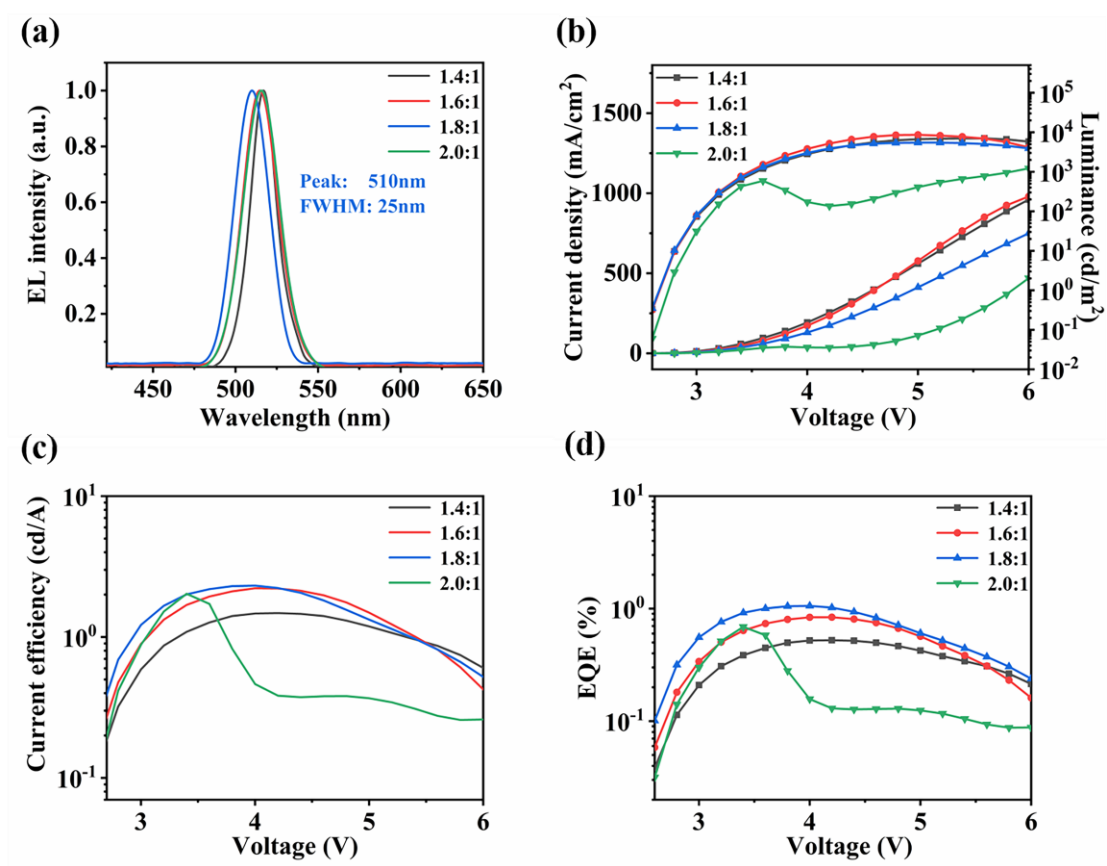

**Figure S2.** (a) Normalized EL spectra, (b) J-V-L, (c) CE-V, and (d) EQE-V curves of PeLEDs based on PEDOT:PSS with different CsBr:PbBr<sub>2</sub> molar ratios of 1.4:1, 1.6:1, 1.8:1, and 2.0:1.

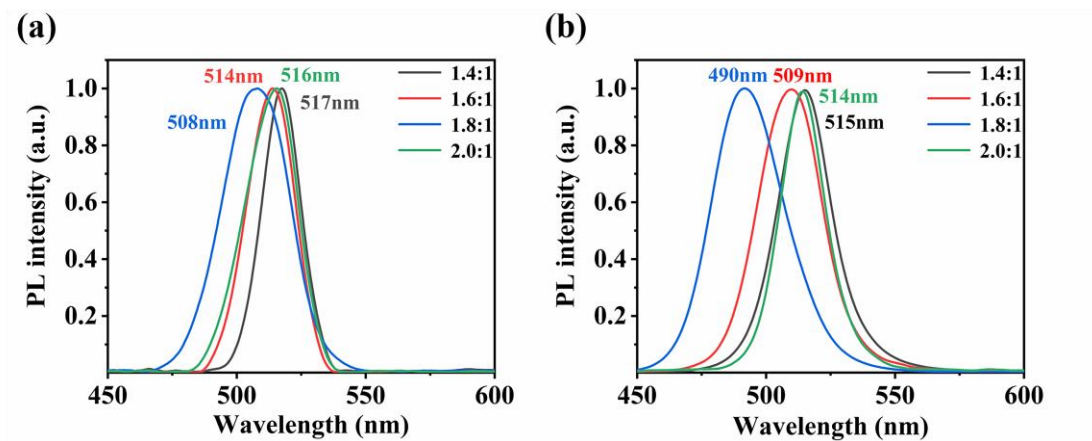

**Figure S3.** PL spectra of devices with different CsBr:PbBr<sub>2</sub> molar ratios of 1.4:1, 1.6:1, 1.8:1, and 2.0:1 based on (a) PEDOT: PSS and (b) NiO<sub>x</sub> hole transport layers respectively.

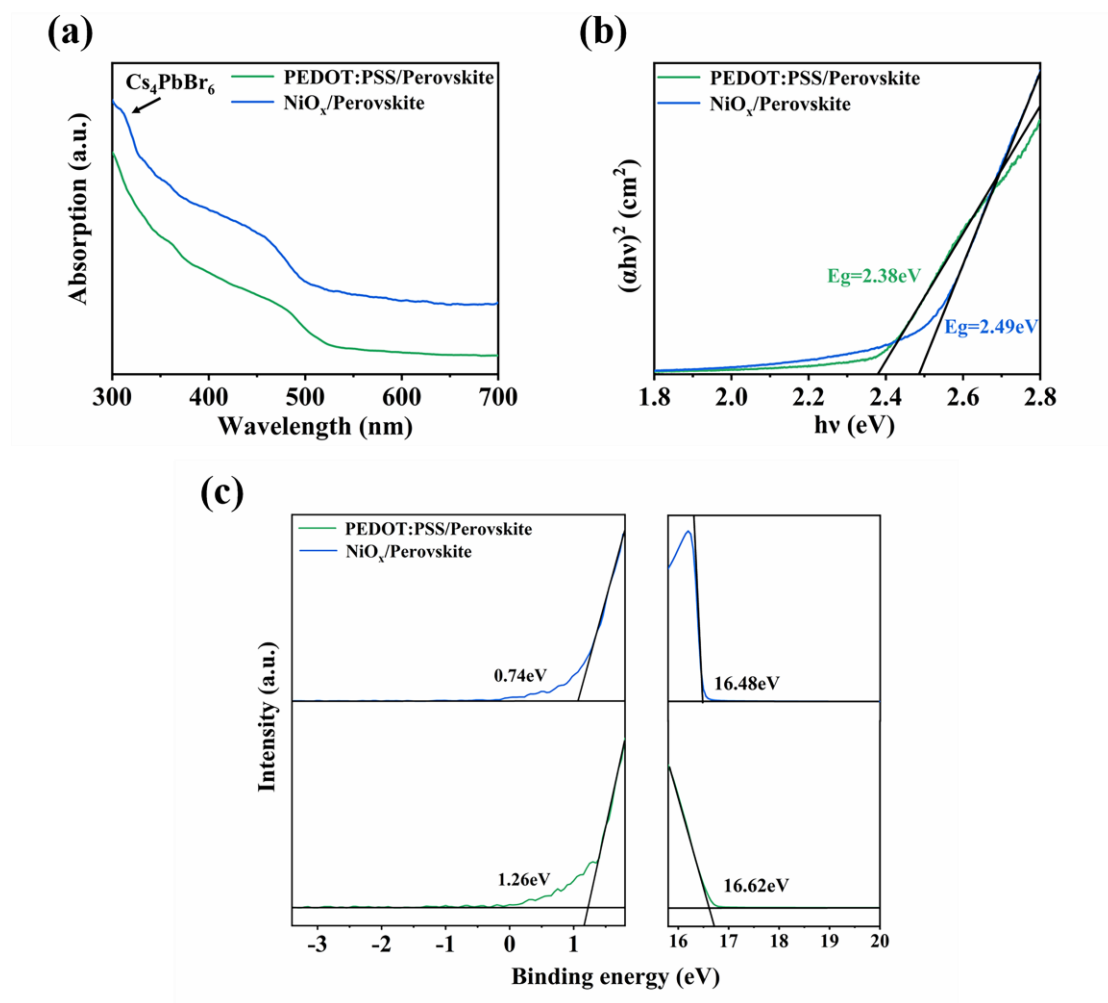

**Figure S4.** (a) Absorption, (b) Tauc plots and (c) UPS spectra of perovskite films with  $\text{CsBr}:\text{PbBr}_2$  molar ratio of 1.8:1 deposited on PEDOT: PSS and  $\text{NiO}_x$ , respectively.

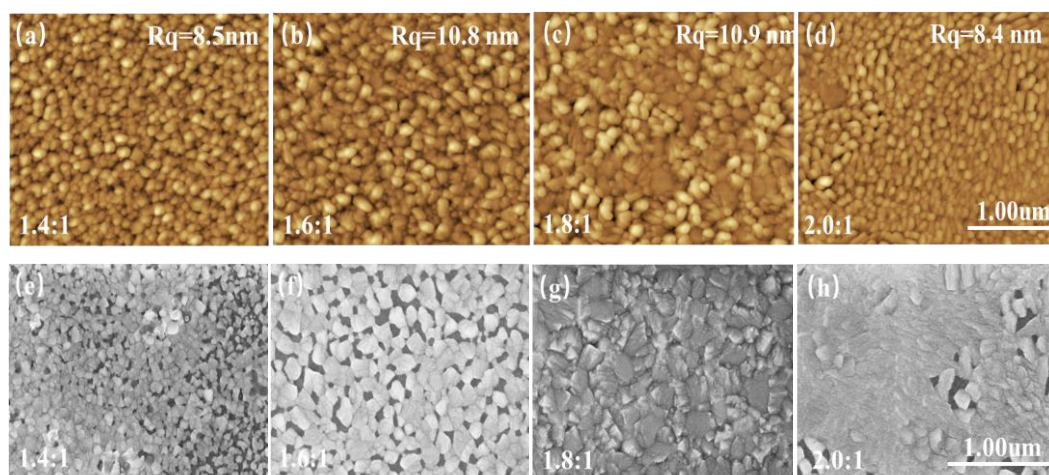

**Figure S5.** (a)–(d) AFM, and (e)–(h) SEM images of of perovskite films deposited on PEDOT: PSS with different CsBr:PbBr<sub>2</sub> molar ratio.

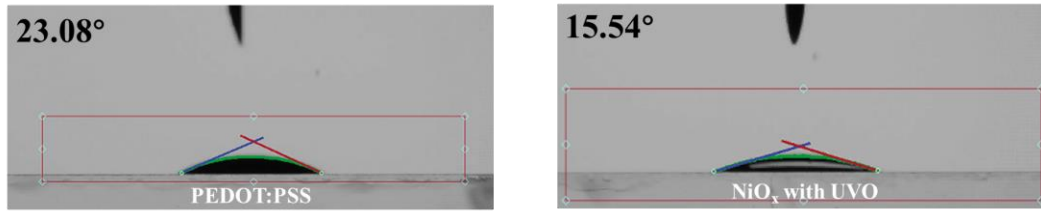

**Figure S6.** Contact angles of perovskite precursor solution droplets on (a) PEDOT: PSS and (b) NiO<sub>x</sub> films, respectively.

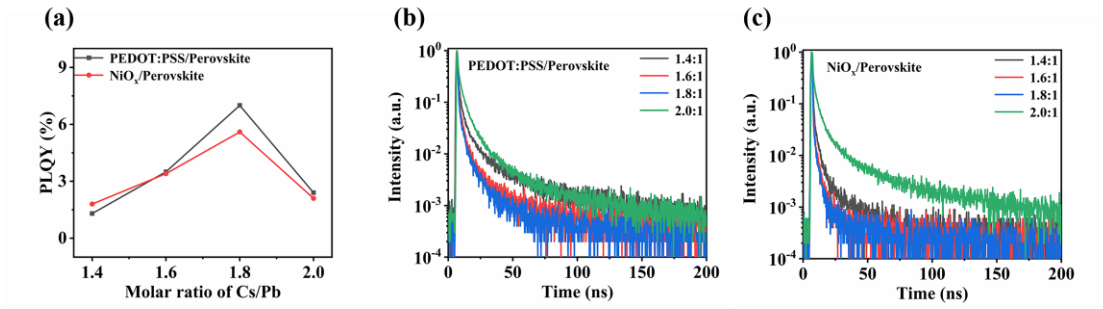

**Figure S7.** (a) PLQY of perovskite films with different CsBr:PbBr<sub>2</sub> molar ratio. TRPL decay curves of the perovskite films with different CsBr:PbBr<sub>2</sub> molar ratio deposited on (b) PEDOT: PSS and (c) NiO<sub>x</sub>, respectively.



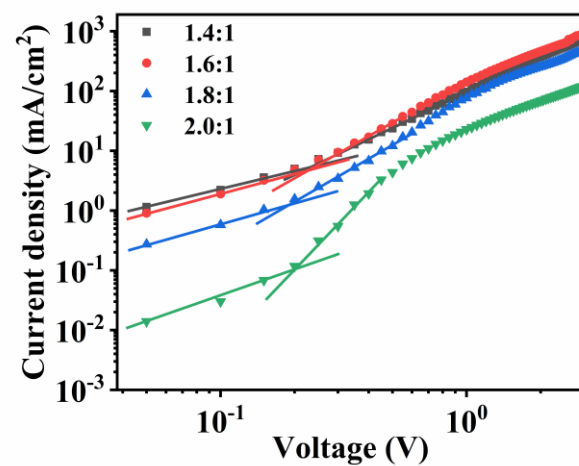

**Figure S8.** J-V curves of hole-only devices with different CsBr:PbBr<sub>2</sub> molar ratios.

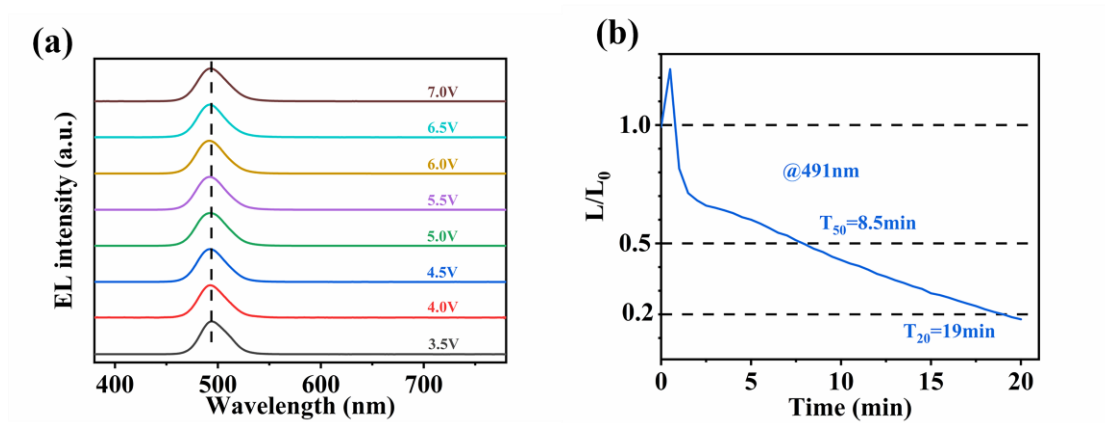

**Figure S9.** (a) EL spectra of the blue PeLED at different voltages. (b) Operational lifetime of the blue PeLED with an initial luminance of 100 cd/m<sup>2</sup>.

**Table S1.** Summary of the optoelectronic properties of the devices fabricated.

| Structure         | EL<br>(nm) | FWHM<br>(nm) | L<br>(cd/m <sup>2</sup> ) | CE<br>(cd/A) | EQE  |
|-------------------|------------|--------------|---------------------------|--------------|------|
| PEDOT:PSS/ 1.4:1  | 517        | 19           | 7020                      | 1.48         | 0.52 |
| PEDOT:PSS / 1.6:1 | 515        | 26           | 8640                      | 2.22         | 0.84 |
| PEDOT:PSS / 1.8:1 | 510        | 25           | 5470                      | 2.32         | 1.05 |
| PEDOT:PSS / 2.0:1 | 516        | 26           | 1380                      | 2.03         | 0.69 |

**Table S2.** Summary of PLQY, PL lifetime,  $K_r$  and  $K_{nr}$  of the perovskite films with different CsBr : PbBr<sub>2</sub> molar ratios.

| PLQY (%)                    | 1.4:1             | 1.6:1             | 1.8:1             | 2.0:1             |
|-----------------------------|-------------------|-------------------|-------------------|-------------------|
| PEDOT:PSS                   | 1.3               | 3.5               | 7.0               | 2.4               |
| NiO <sub>x</sub>            | 1.8               | 3.4               | 5.6               | 2.1               |
| PL lifetime (ns)            |                   |                   |                   |                   |
| PEDOT:PSS                   | 8.1               | 4.5               | 3.5               | 8.2               |
| NiO <sub>x</sub>            | 2.7               | 2.1               | 1.6               | 9.8               |
| $k_r$ (s <sup>-1</sup> )    |                   |                   |                   |                   |
| PEDOT:PSS                   | $1.6 \times 10^6$ | $7.8 \times 10^6$ | $2.0 \times 10^7$ | $2.9 \times 10^6$ |
| NiO <sub>x</sub>            | $6.7 \times 10^6$ | $1.6 \times 10^7$ | $3.5 \times 10^7$ | $2.1 \times 10^6$ |
| $k_{nr}$ (s <sup>-1</sup> ) |                   |                   |                   |                   |
| PEDOT:PSS                   | $1.2 \times 10^8$ | $2.1 \times 10^8$ | $2.7 \times 10^8$ | $1.2 \times 10^8$ |
| NiO <sub>x</sub>            | $3.6 \times 10^8$ | $4.6 \times 10^8$ | $5.9 \times 10^8$ | $1.0 \times 10^8$ |

**Table S3.** Summary of the trap density of the perovskite films on NiO<sub>x</sub>.

|                                          | 1.4:1                 | 1.6:1                 | 1.8:1                 | 2.0:1              |
|------------------------------------------|-----------------------|-----------------------|-----------------------|--------------------|
| V <sub>TFL</sub> (V)                     | 0.23                  | 0.22                  | 0.19                  | 0.20               |
| N <sub>defects</sub> (cm <sup>-3</sup> ) | $1.16 \times 10^{17}$ | $1.11 \times 10^{17}$ | $9.61 \times 10^{16}$ | $1 \times 10^{17}$ |
